# Supplementary material for: Mitochondria‐associated membrane collapse is a common pathomechanism in SIGMAR1‐ and SOD1‐linked ALS
Source: PubMed Central journal article supplement (PMC5167132; doi:10.15252/emmm.201606403), 2016-11-07
Supplement: EMMM-8-1421-s003.pdf [file EMMM-8-1421-s003.pdf]

**Fig. 2A**

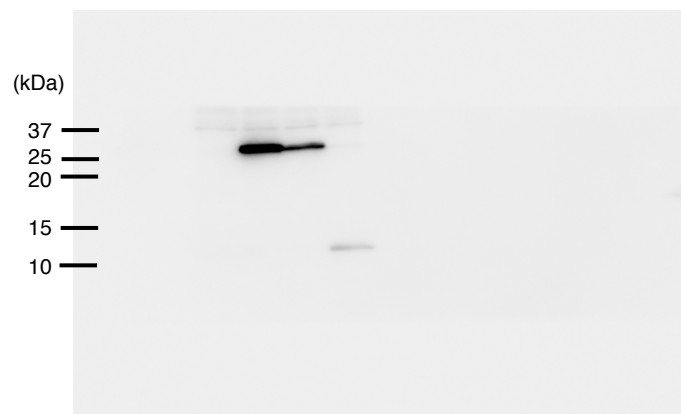

**IB: FLAG(Sig1R)**

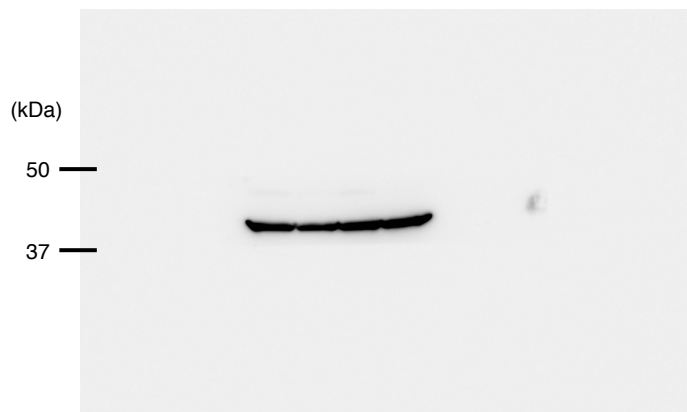

**IB: actin**

**Fig. 2B**

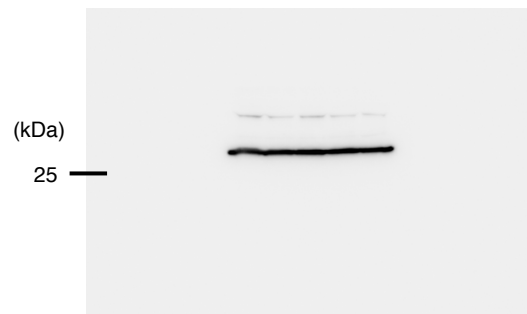

**Wild type**

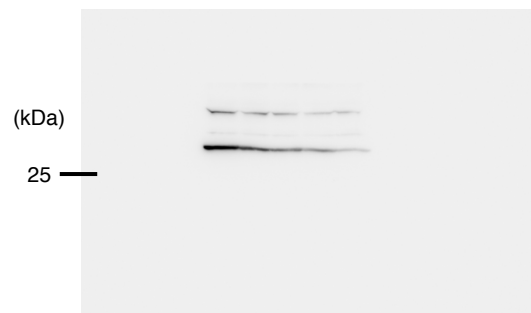

**E102Q**

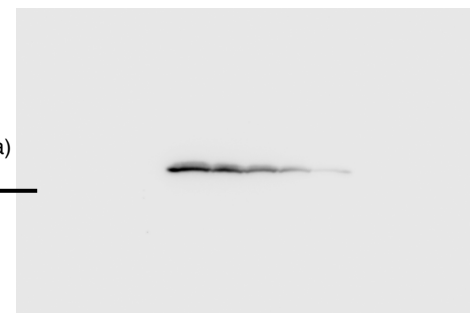

**L95fs**

**IB: FLAG(Sig1R)**

**Fig. 2C**

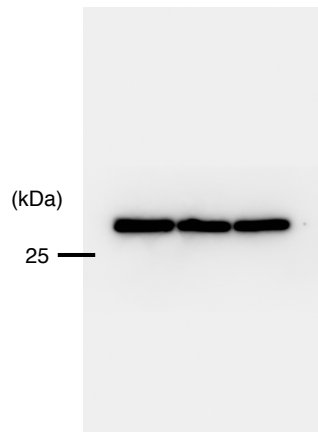

**Wild type**

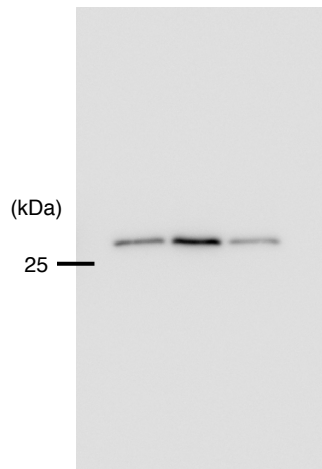

**E102Q**

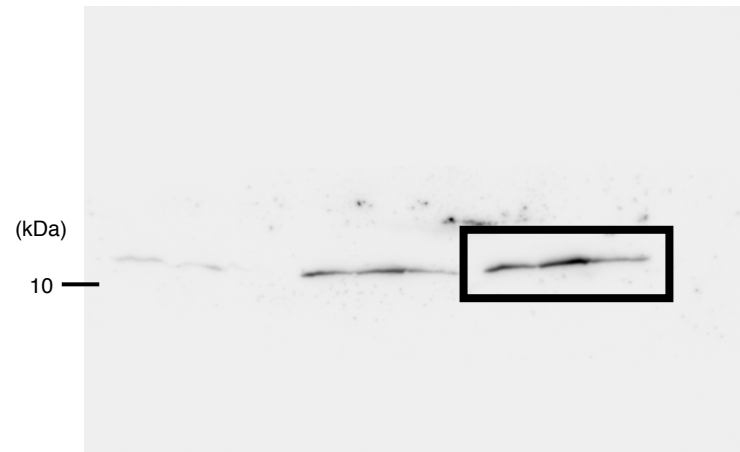

**L95fs**

**(three independently prepared samples  
were loaded at the same time)**

**IB: FLAG (Sig1R)**

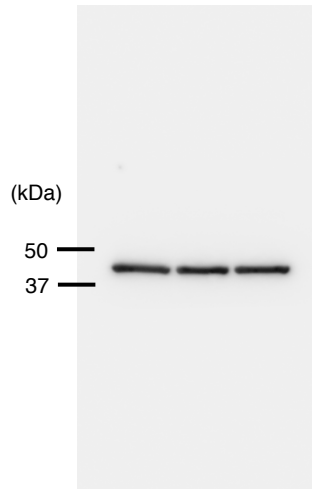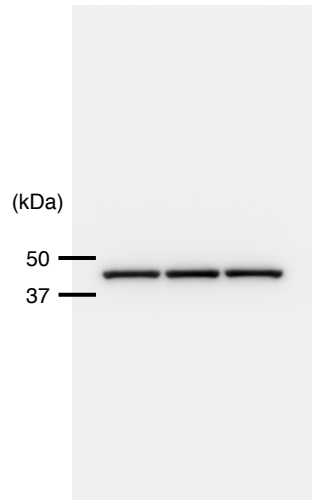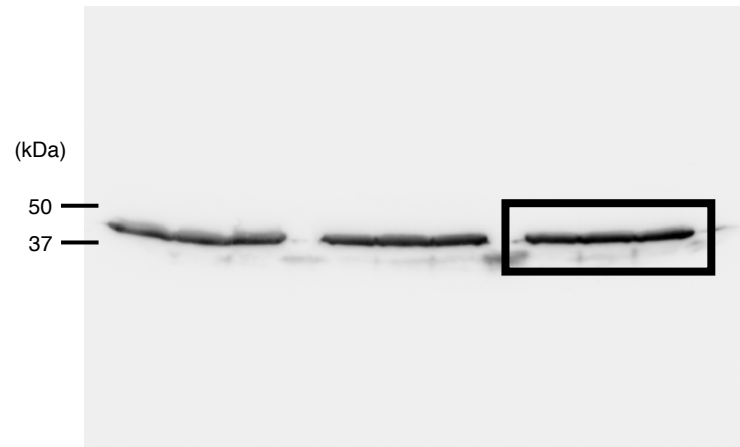

**IB: actin**

**Fig. 2E**

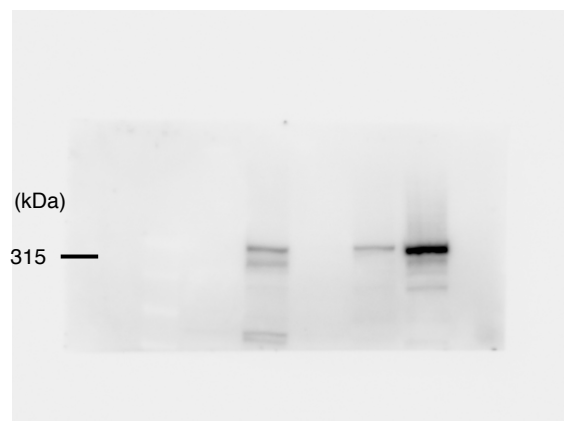

**IB: IP<sub>3</sub>R1**

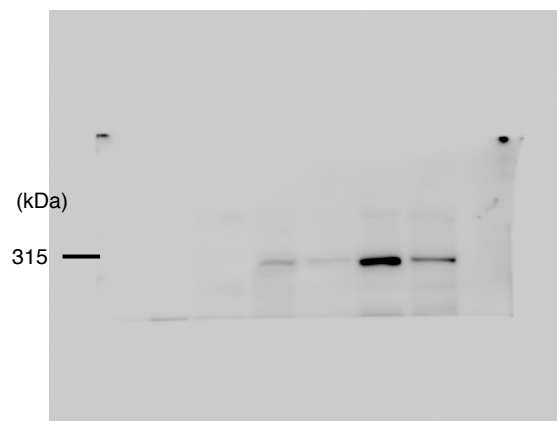

**IB: IP<sub>3</sub>R3**

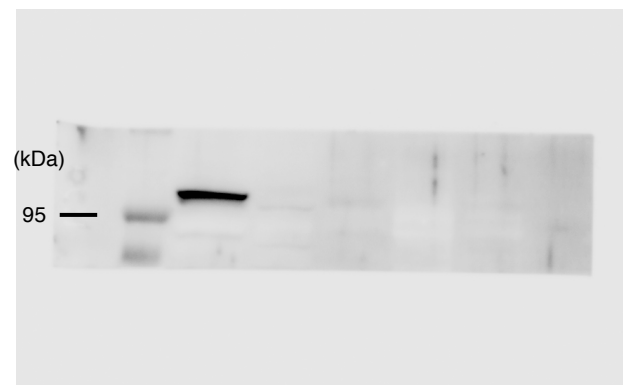

**IB: Hsp110**

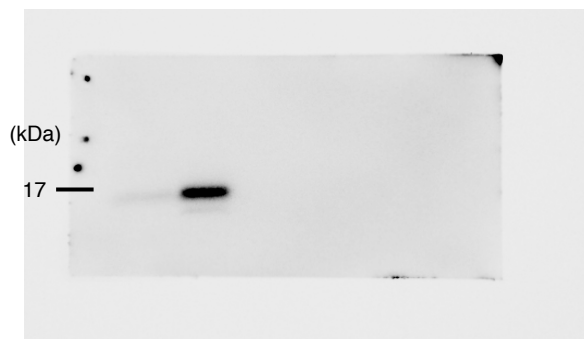

**IB: Histone H3**

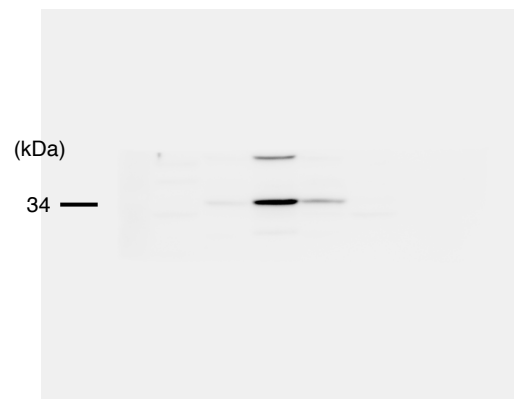

**IB: VDAC**

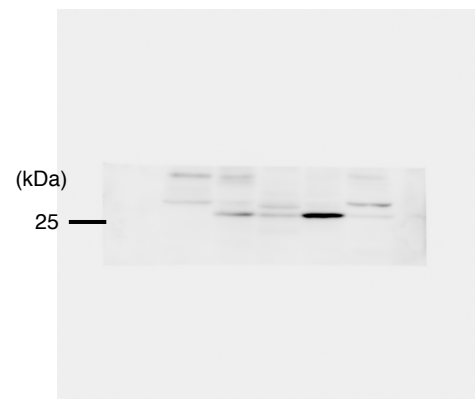

**IB: Sig1R**

**Fig. 2E**

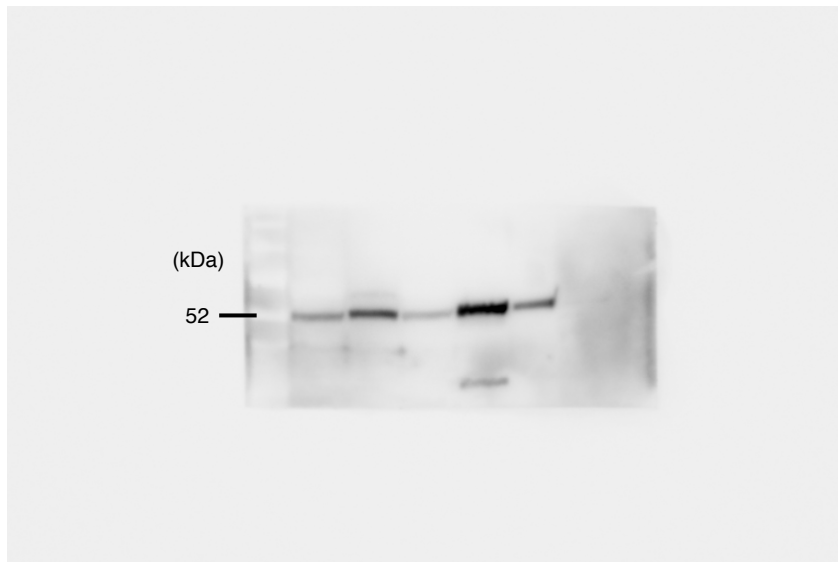

**IB: Calreticulin**

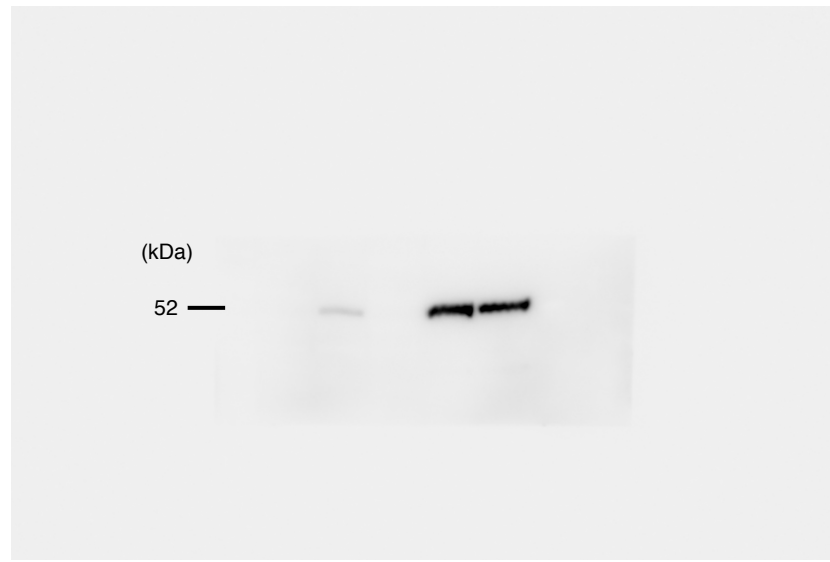

**IB: PDI**

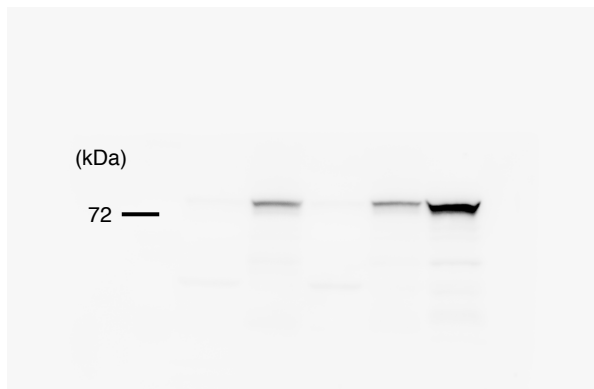

**IB: CYPOR**

**Fig. 2F**

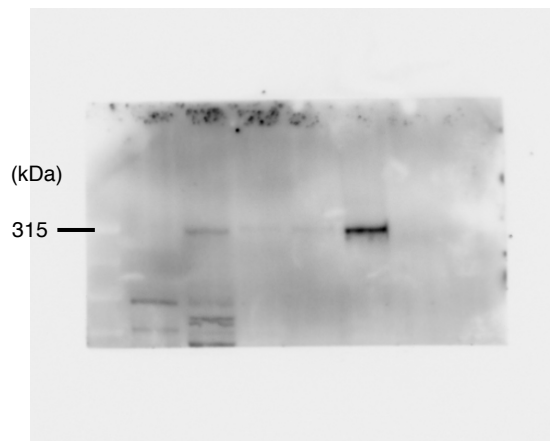

**IB: IP<sub>3</sub>R1**

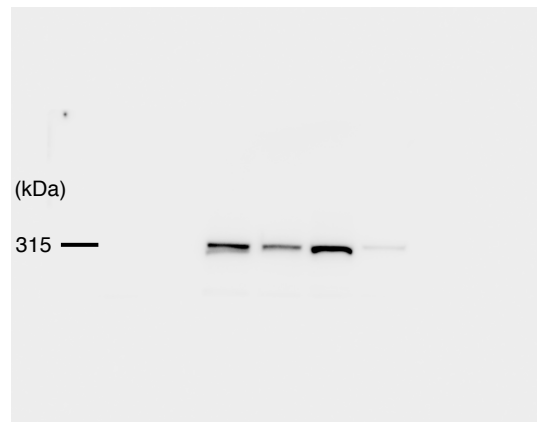

**IB: IP<sub>3</sub>R3**

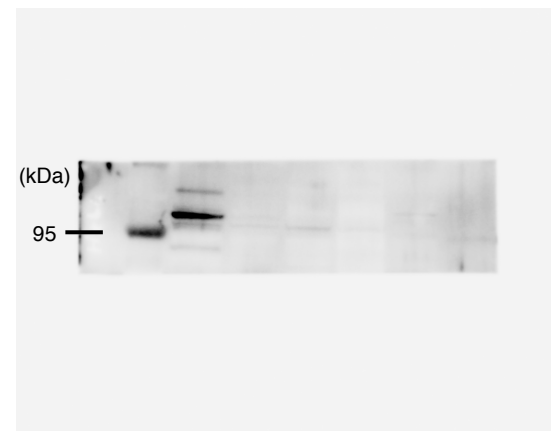

**IB: Hsp110**

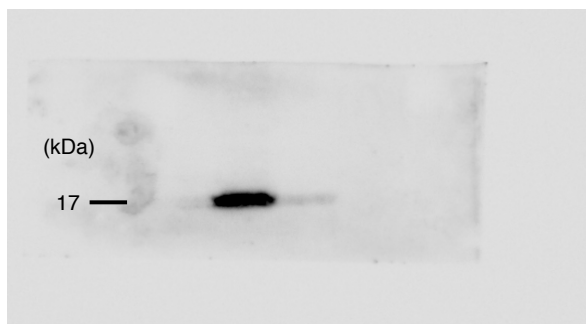

**IB: Histone H3**

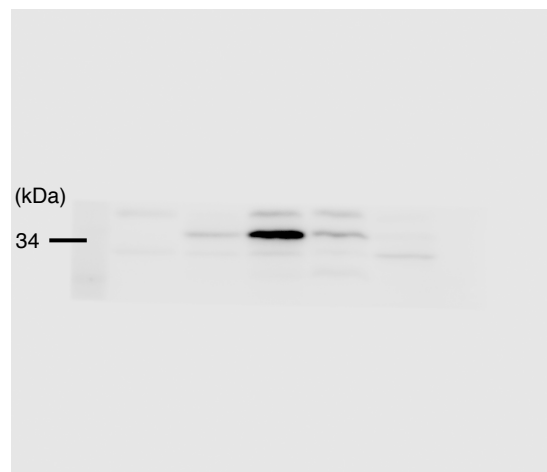

**IB: VDAC**

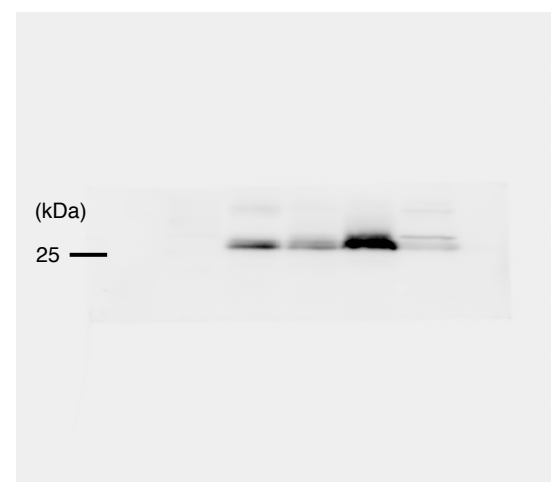

**IB: Sig1R**

**Fig. 2F**

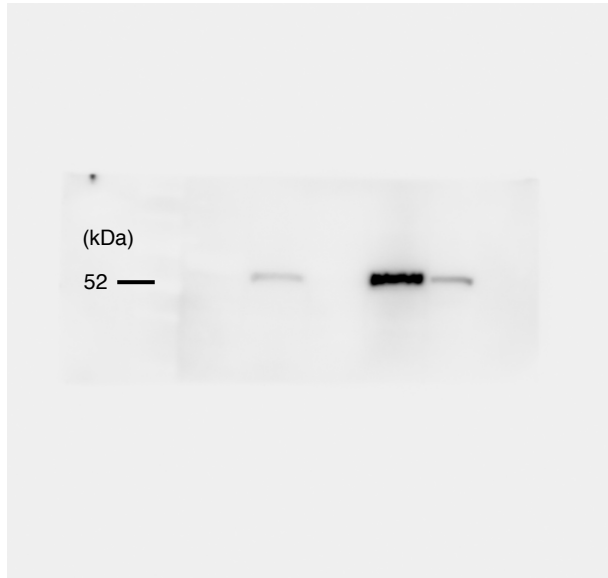

**IB: Calreticulin**

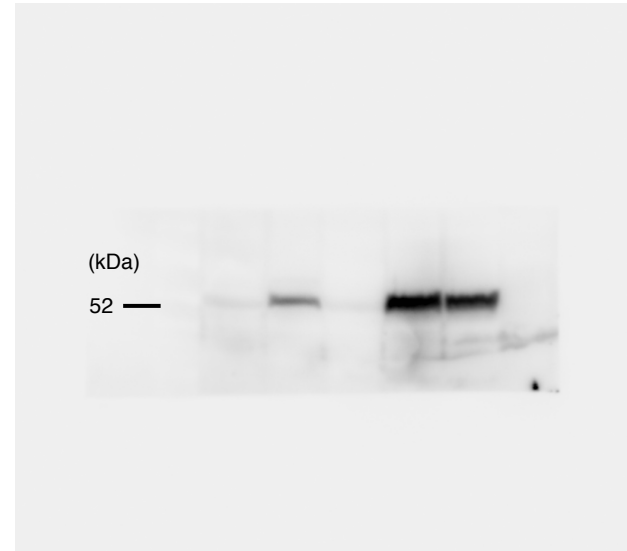

**IB: PDI**

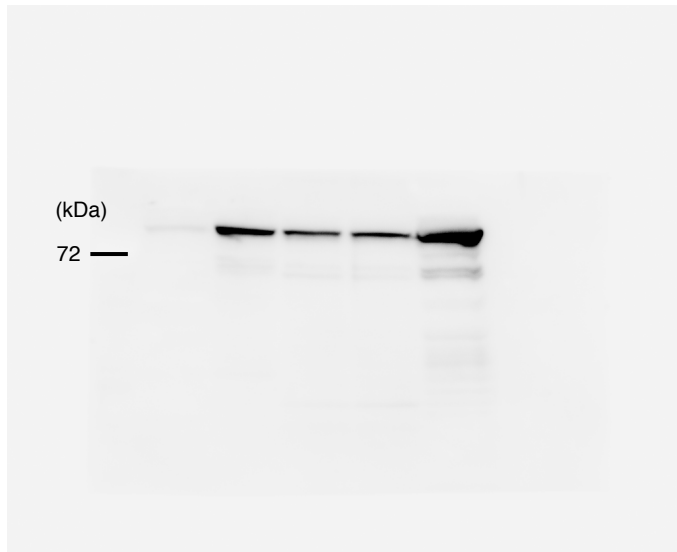

**IB: CYPOR**

**Fig. 2G**

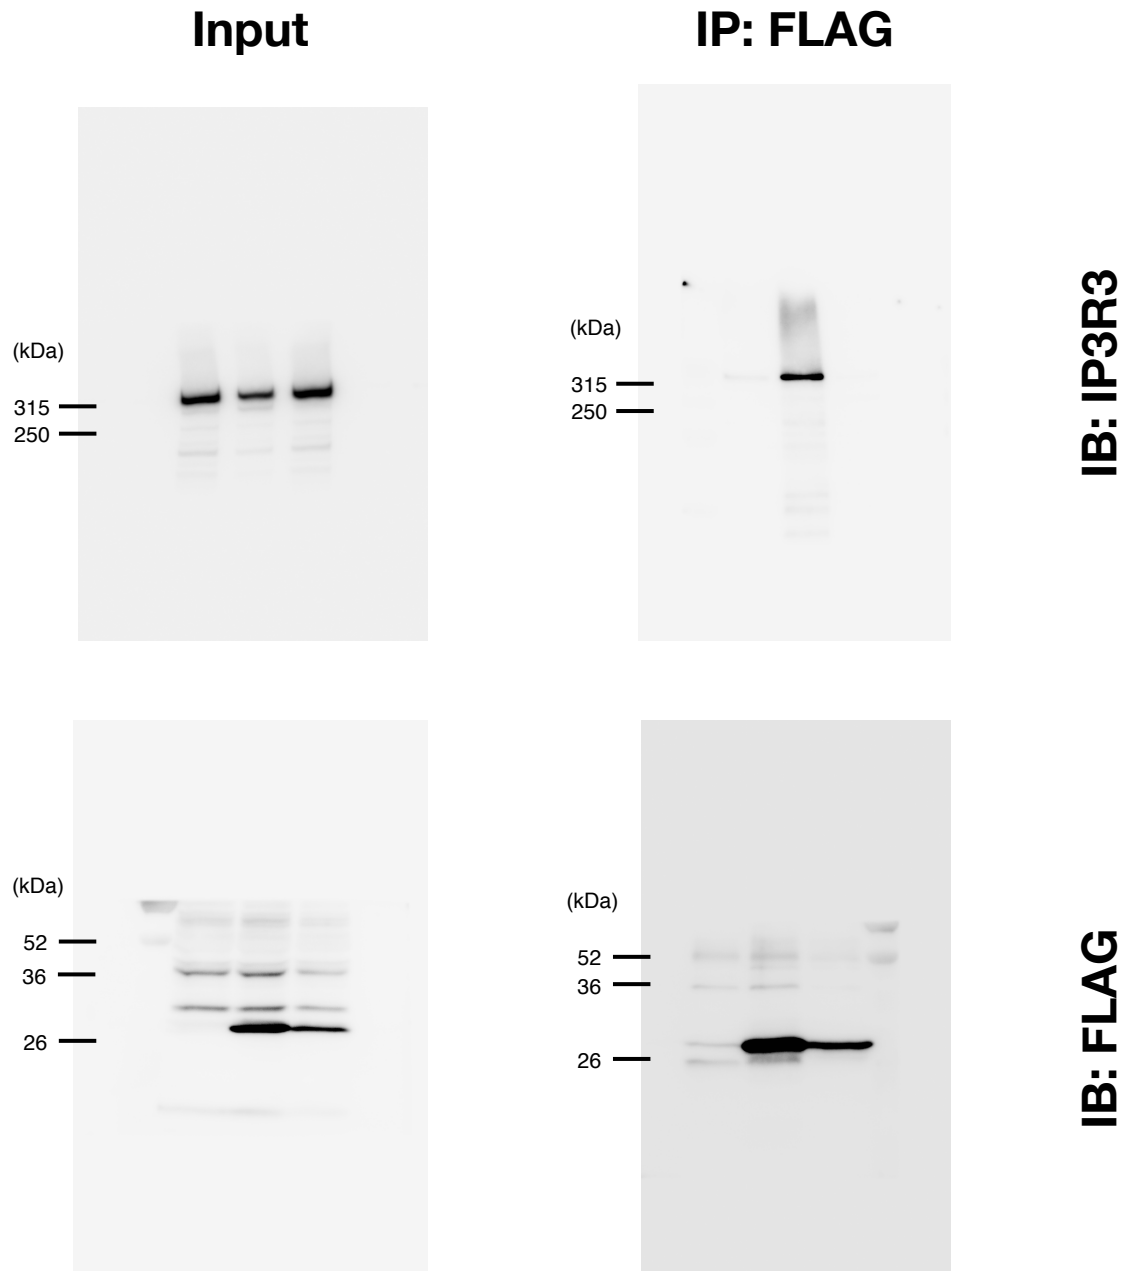

**Fig. 2H**

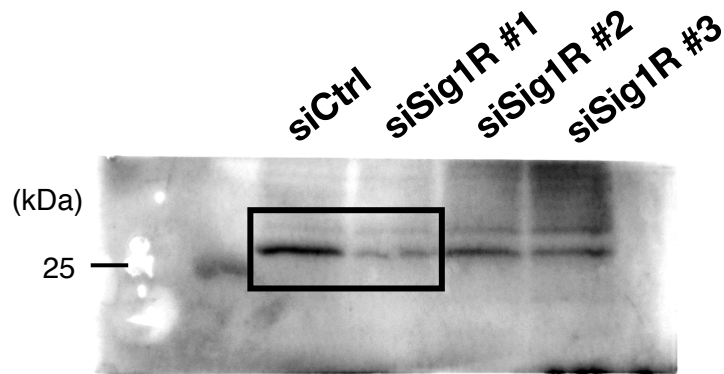

**IB: Sig1R**

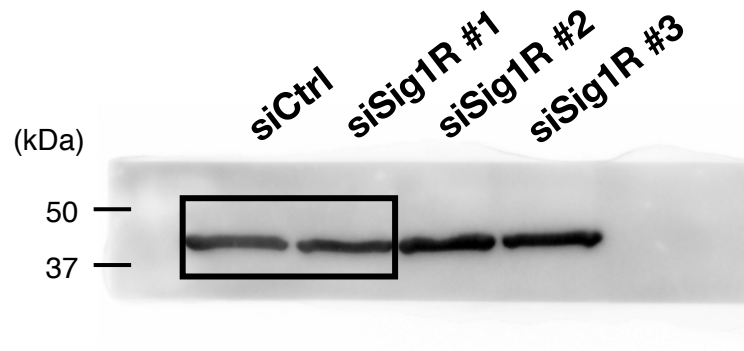

**IB: actin**

\* siSig1R#1 is used in the other experiments in this study
