# Supplementary material for: Mitochondria‐associated membrane collapse is a common pathomechanism in SIGMAR1‐ and SOD1‐linked ALS
Source: PubMed Central journal article supplement (PMC5167132; doi:10.15252/emmm.201606403), 2016-11-07
Supplement: EMMM-8-1421-s005.pdf [file EMMM-8-1421-s005.pdf]

**Fig. 4A**

**Wild type**

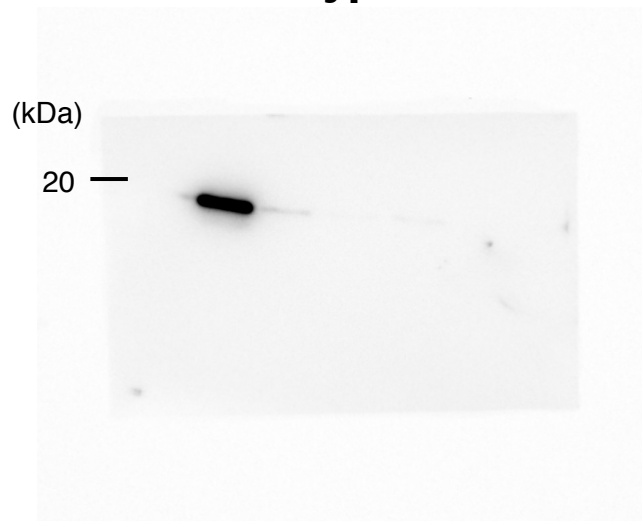

**IB: myc**

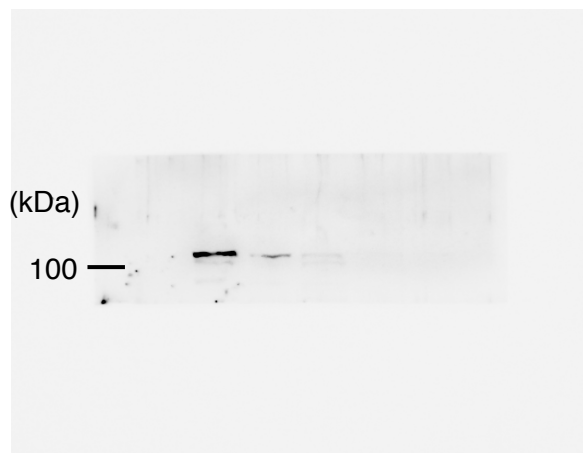

**IB: Hsp110**

**G85R**

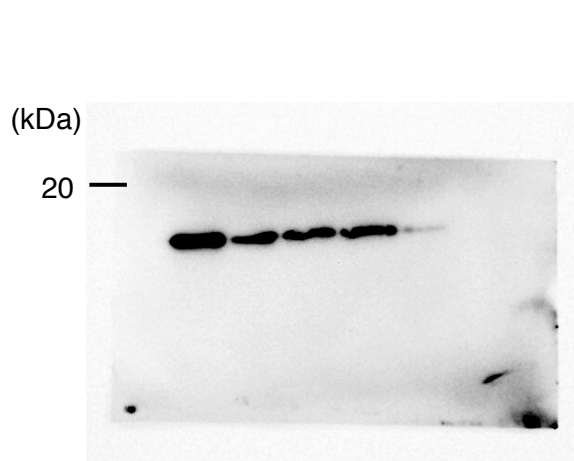

**IB: myc**

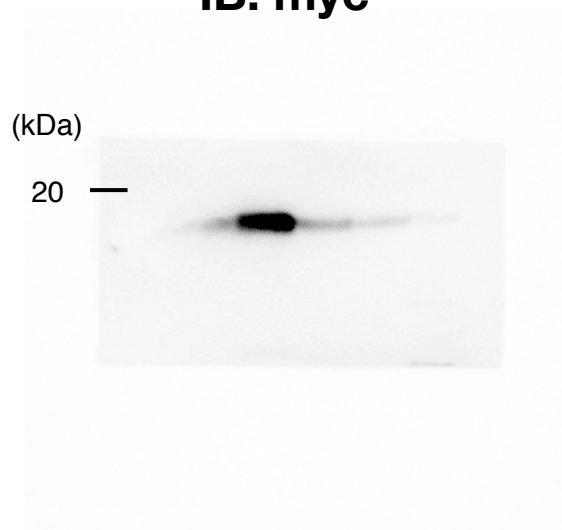

**IB: Histone H3**

**G93A**

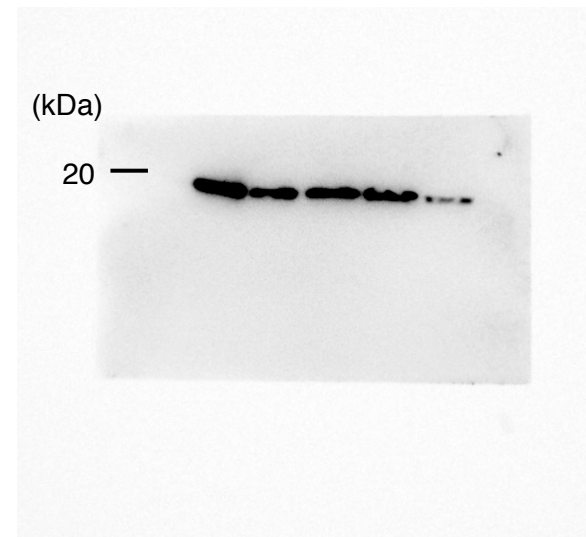

**IB: myc**

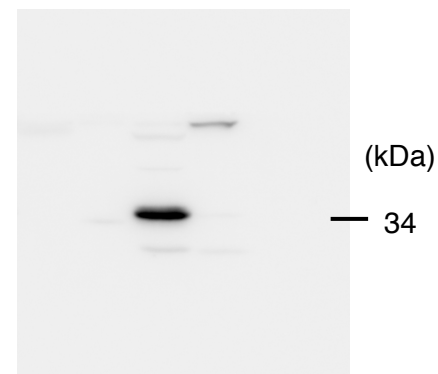

**IB: VDAC**

**Fig. 4A**

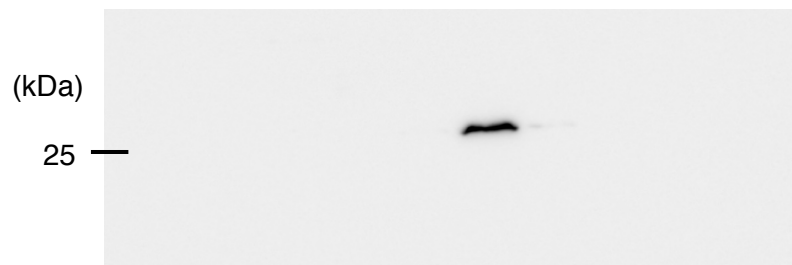

**IB: Sig1R**

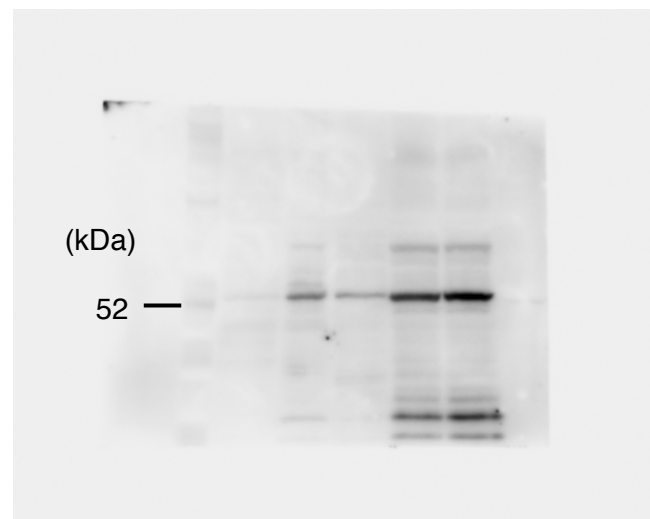

**IB: PDI**

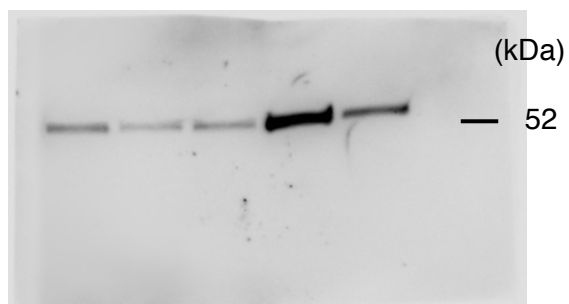

**IB: Calreticulin**

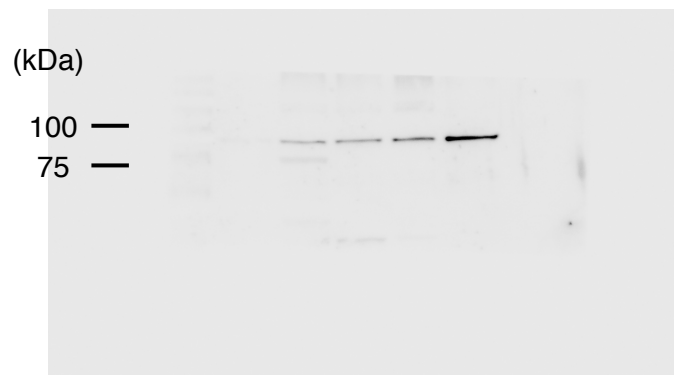

**IB: CYPOR**

**Fig. 4B**

**SOD1<sup>WT</sup> LSC**

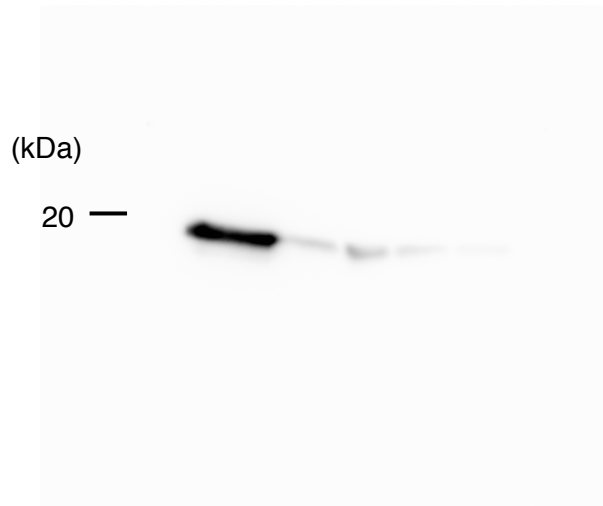

**IB: SOD1**

**SOD1<sup>G37R</sup> LSC**

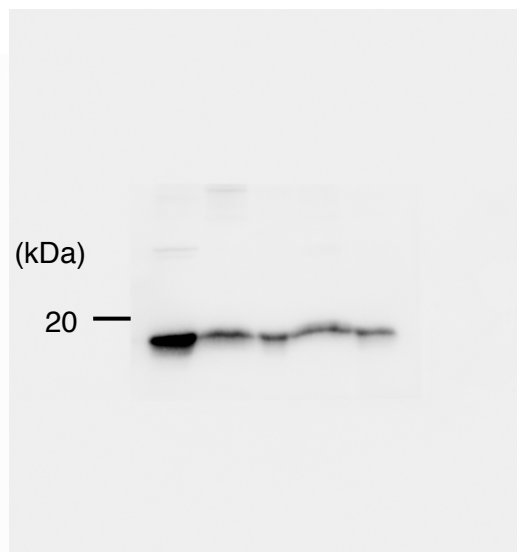

**IB: SOD1**

**SOD1<sup>G85R</sup> LSC**

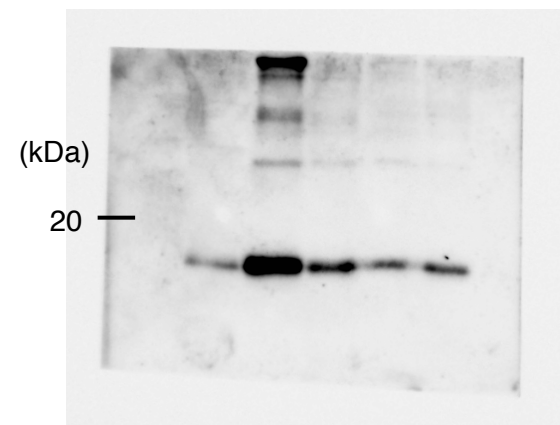

**IB: SOD1**

**SOD1<sup>G93A</sup> LSC**

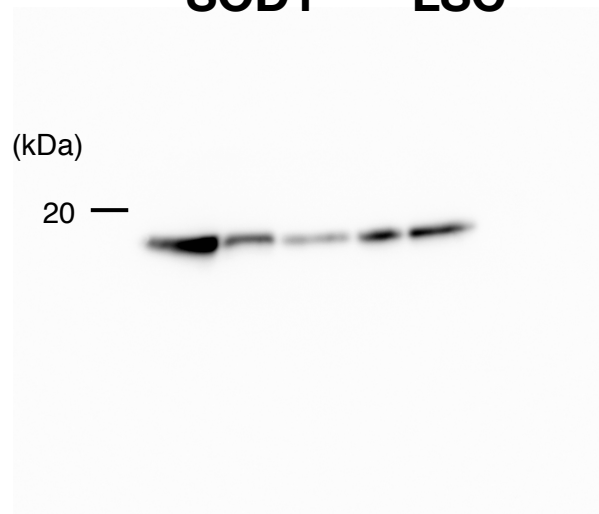

**IB: SOD1**

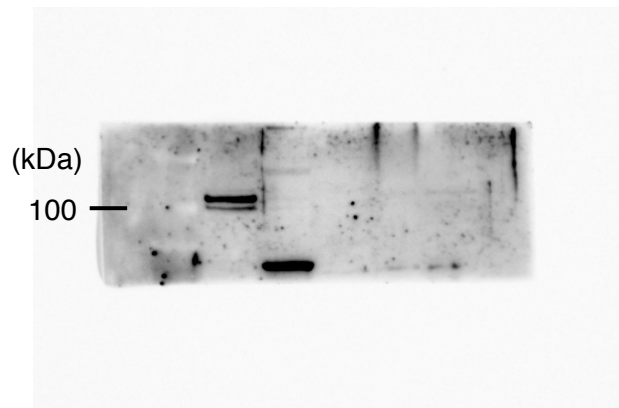

**IB: Hsp110**

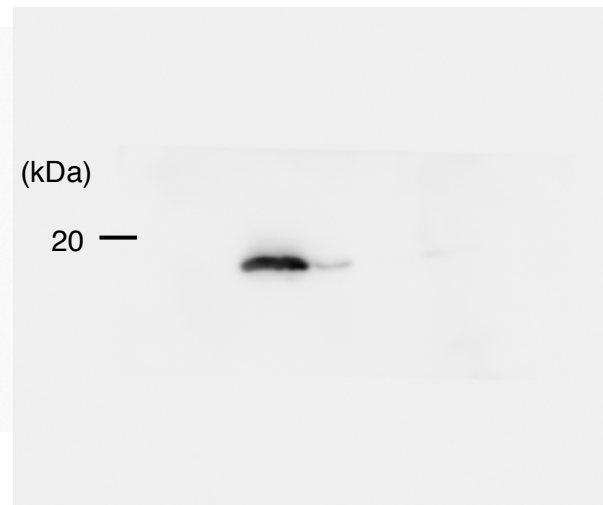

**IB: Histone H3**

**Fig. 4B**

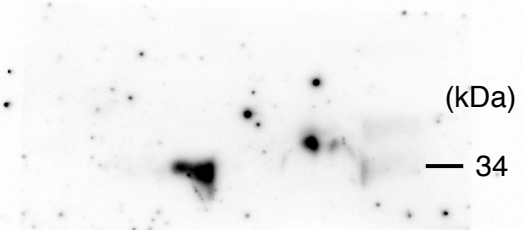

**IB: VDAC**

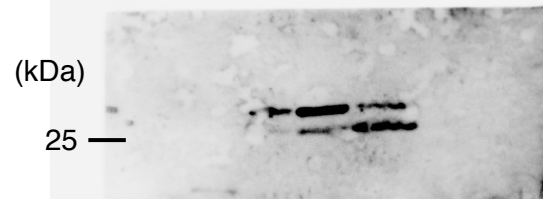

**IB: Sig1R**

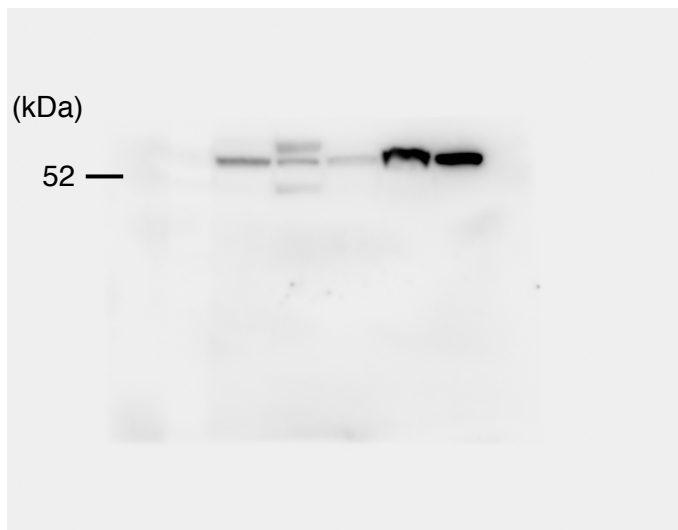

**IB: PDI**

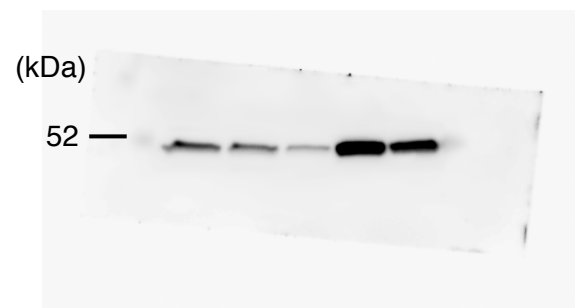

**IB: Calreticulin**

**Fig. 4B**

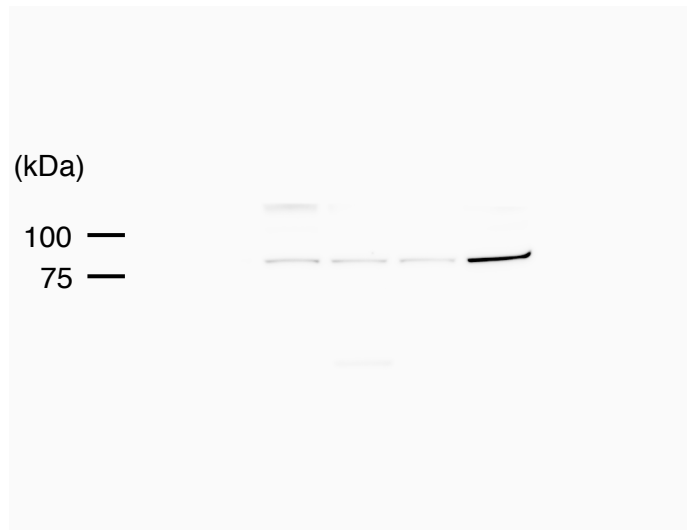

**IB: CYPOR**

**Fig. 4C**

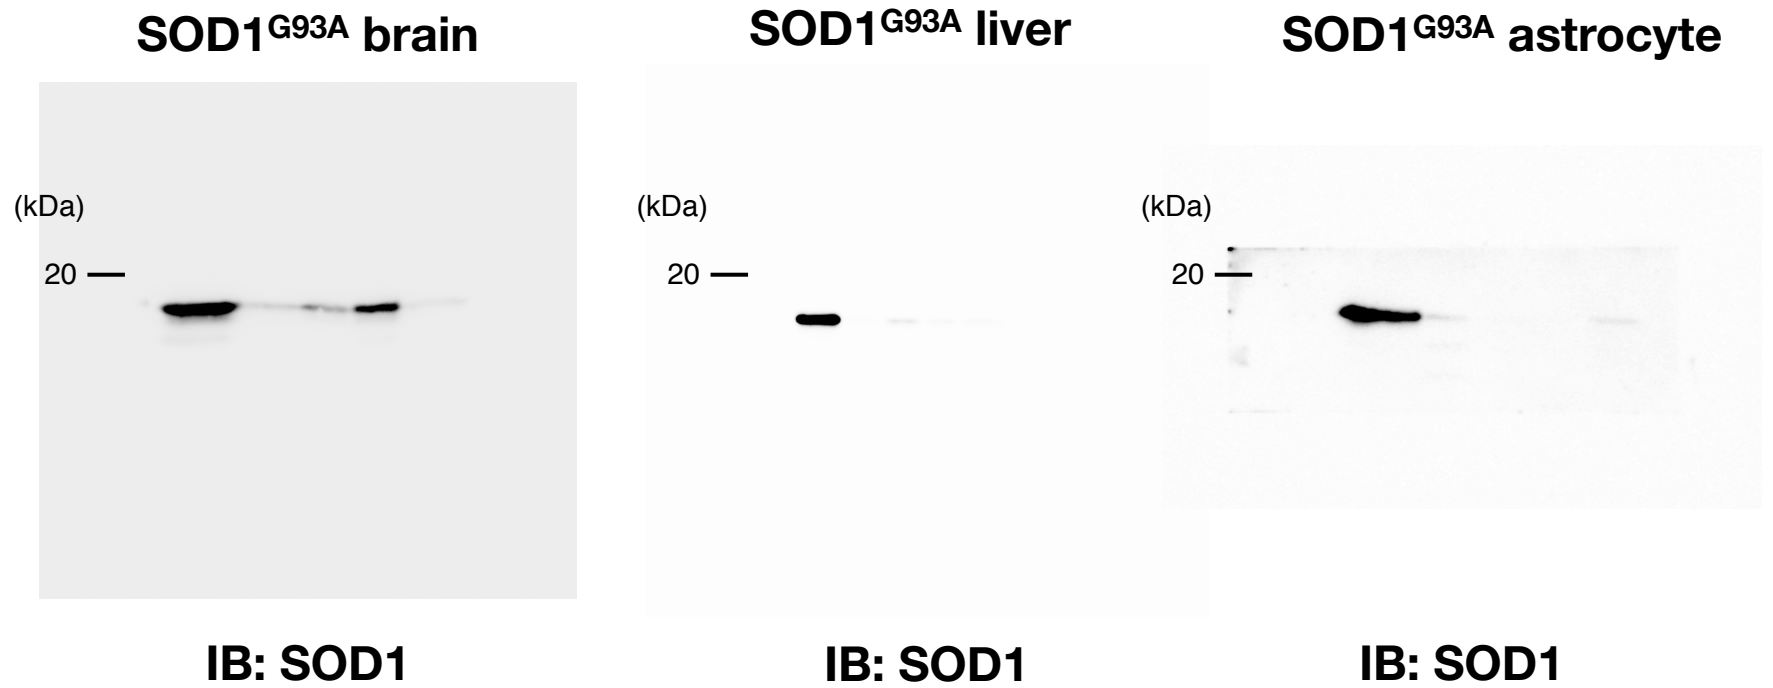

**Fig. 4D**

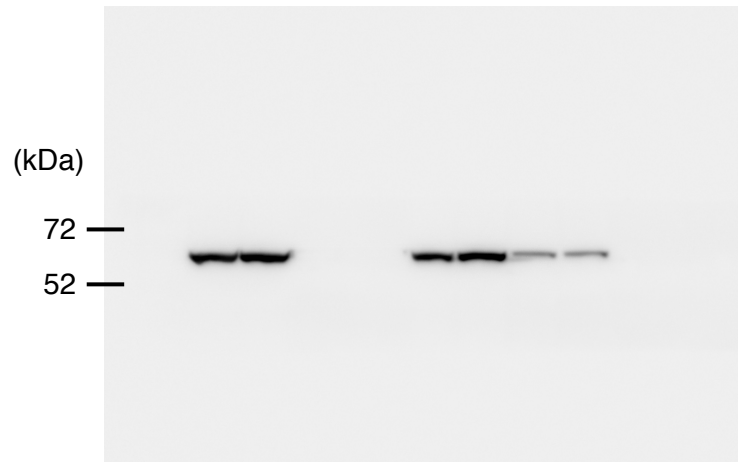

**IB: PDI**

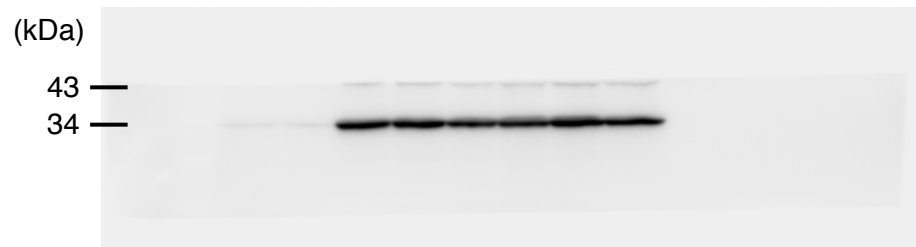

**IB: VDAC**
