# Supplementary material for: Mitochondria‐associated membrane collapse is a common pathomechanism in SIGMAR1‐ and SOD1‐linked ALS
Source: PubMed Central journal article supplement (PMC5167132; doi:10.15252/emmm.201606403), 2016-11-07
Supplement: EMMM-8-1421-s006.pdf [file EMMM-8-1421-s006.pdf]

**Fig. 5A**

**Cyto**

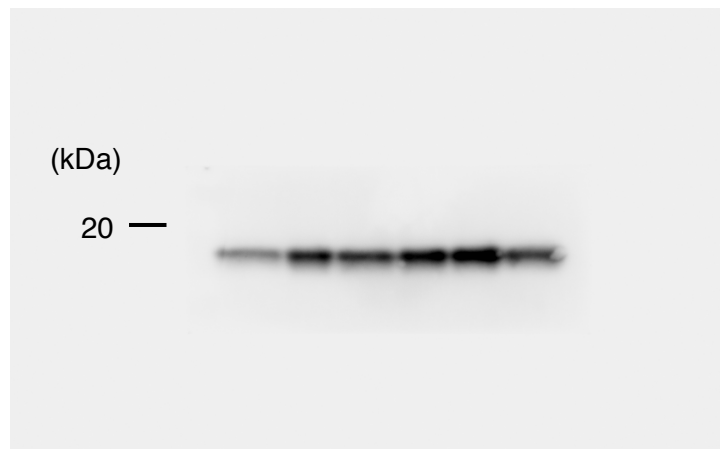

**IB: SOD1**

**P1**

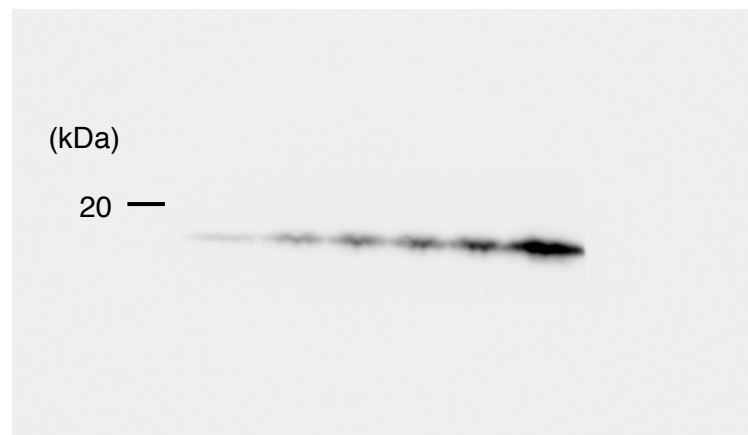

**IB: SOD1**

**mito**

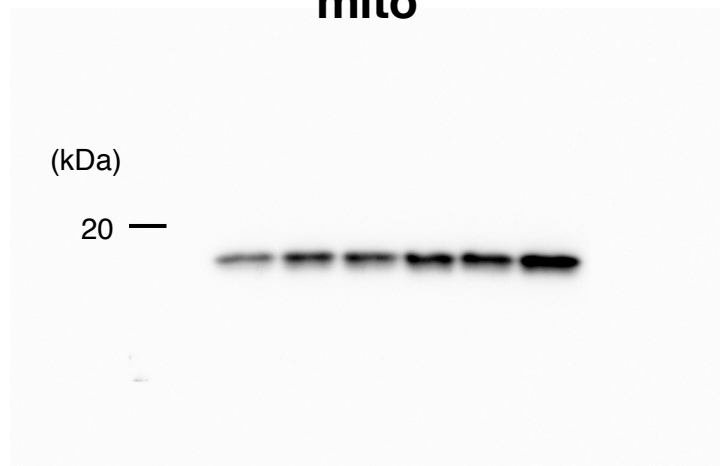

**IB: SOD1**

**MAM**

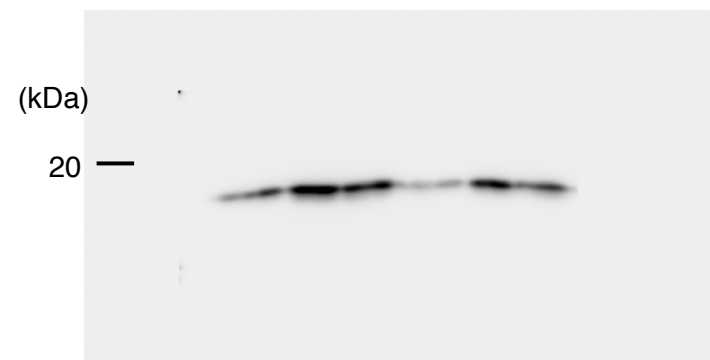

**IB: SOD1**

**Fig. 5A**

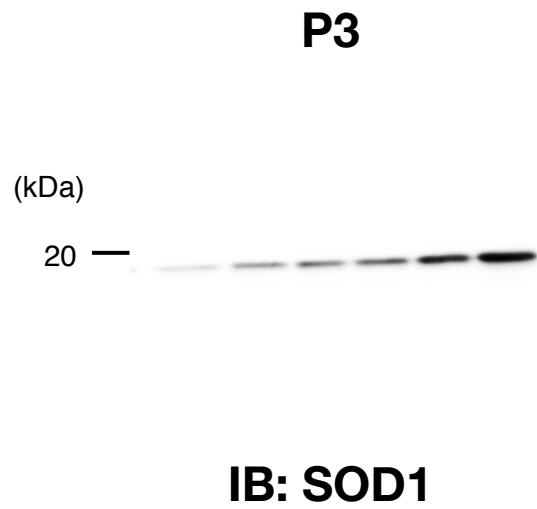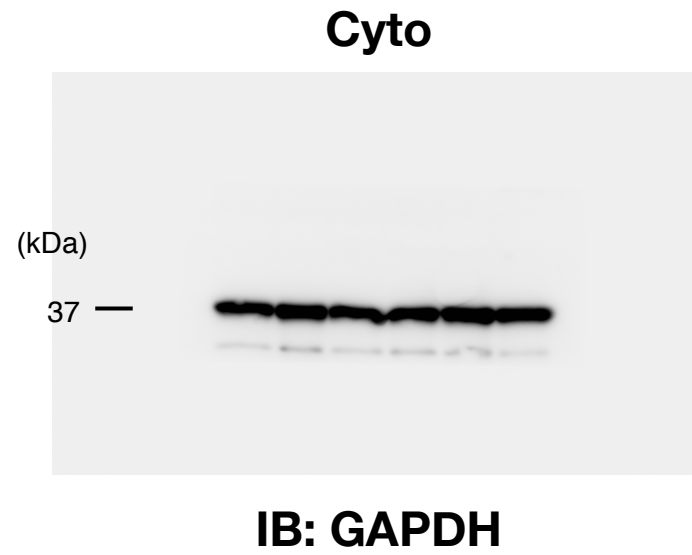

**Fig. 5B**

**Cyto**

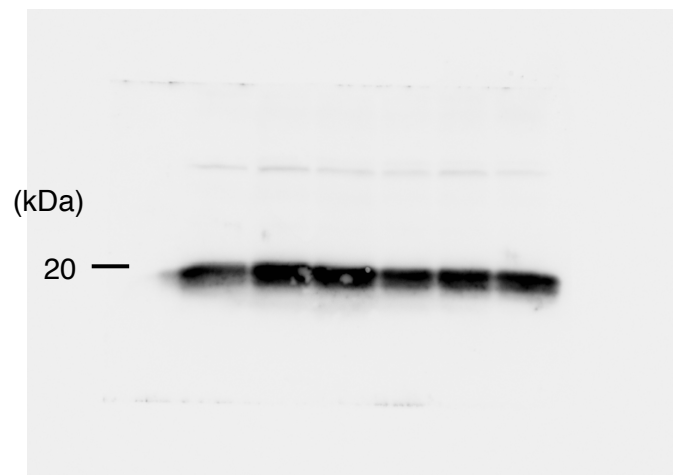

**IB: SOD1**

**P1**

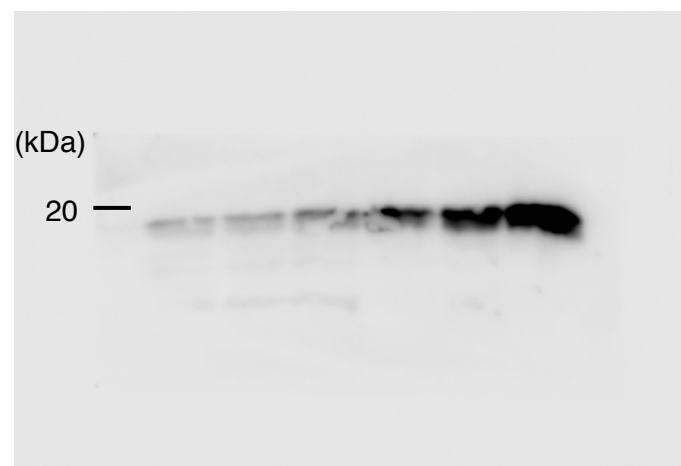

**IB: SOD1**

**mito**

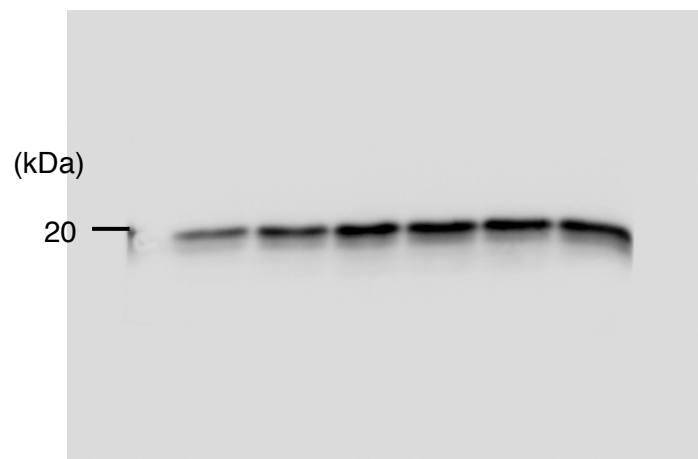

**IB: SOD1**

**MAM**

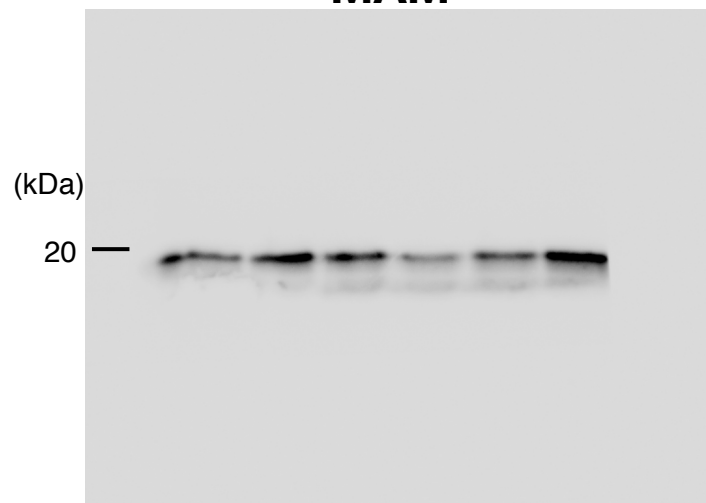

**IB: SOD1**

**Fig. 5B**

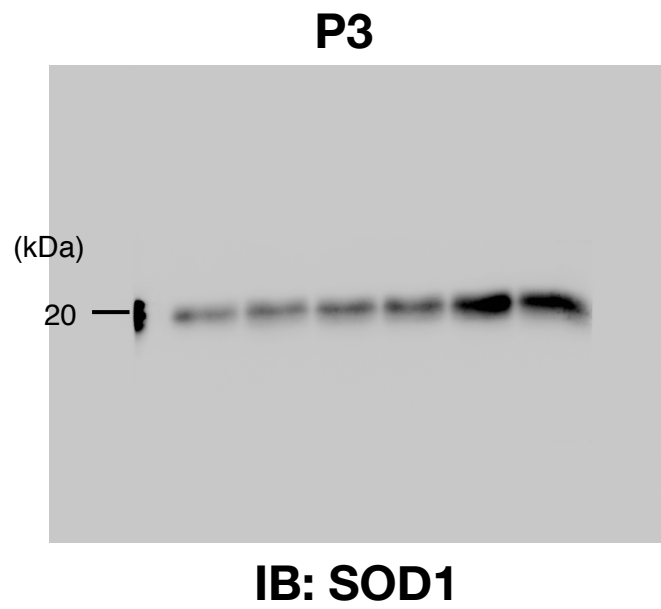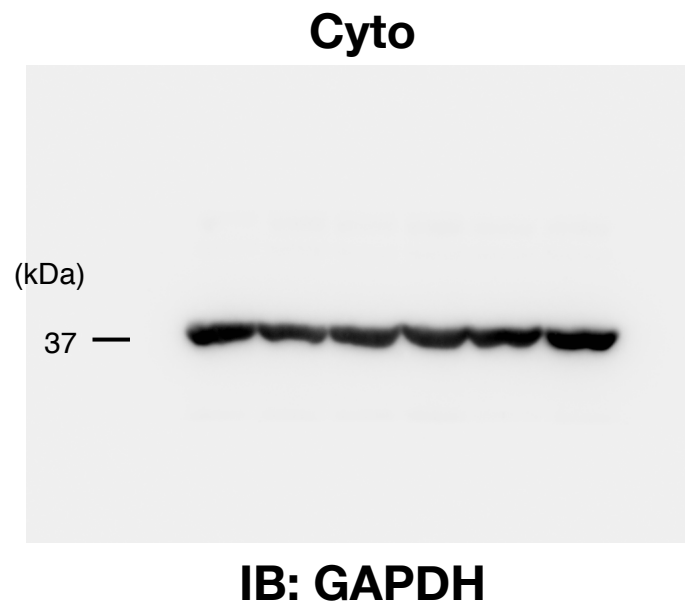

**Fig. 5C**

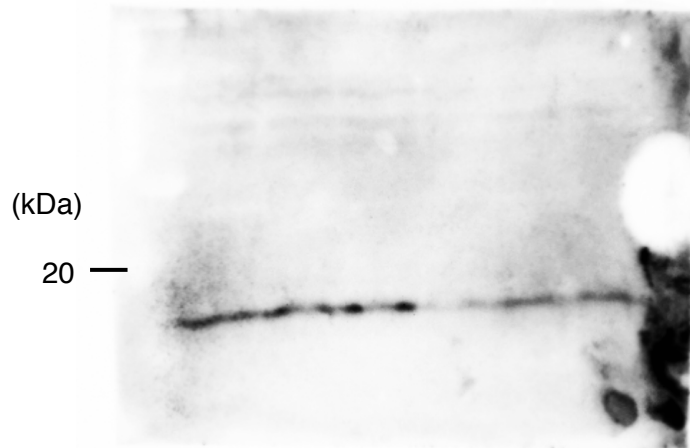

**IB: hSOD1**

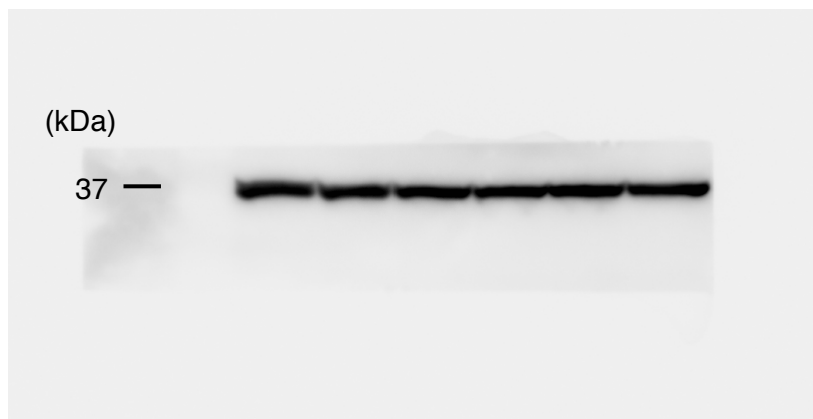

**IB: GAPDH**

**Fig. 5D**

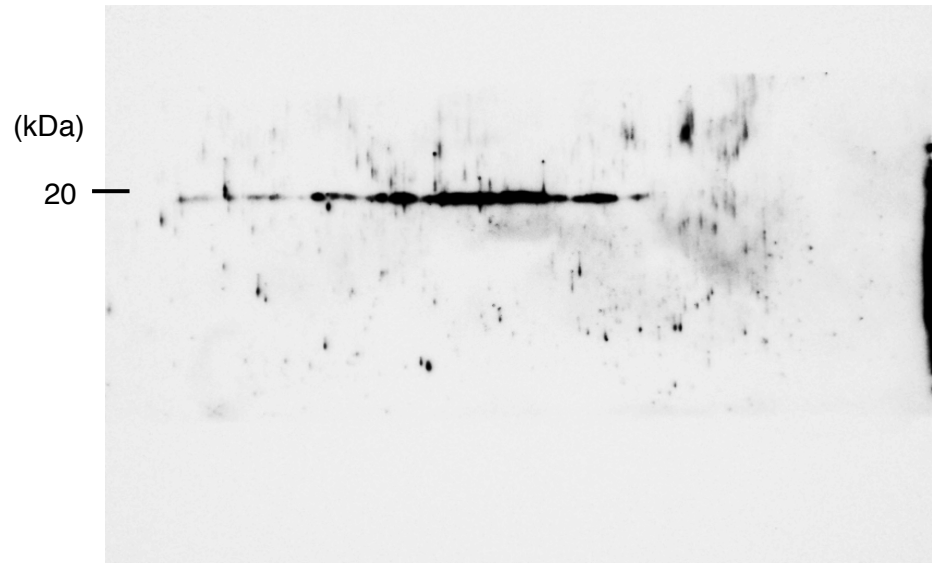

**IB: hSOD1**

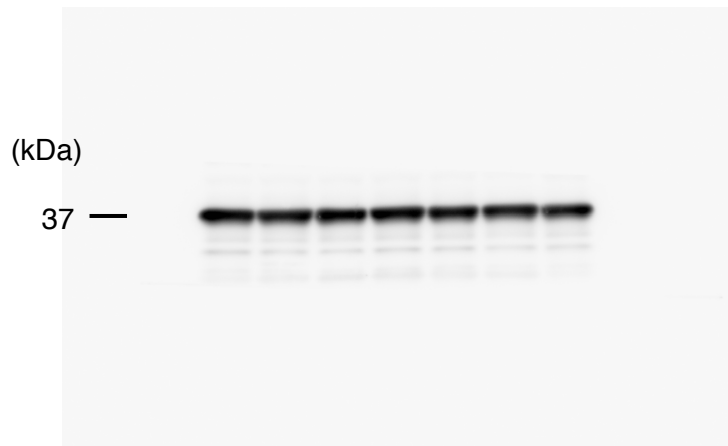

**IB: GAPDH**

**Fig. 5E**

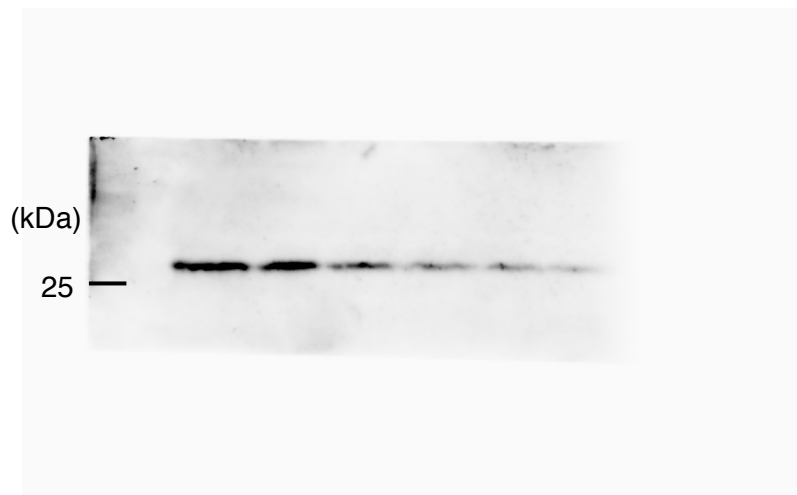

**IB: Sig1R**

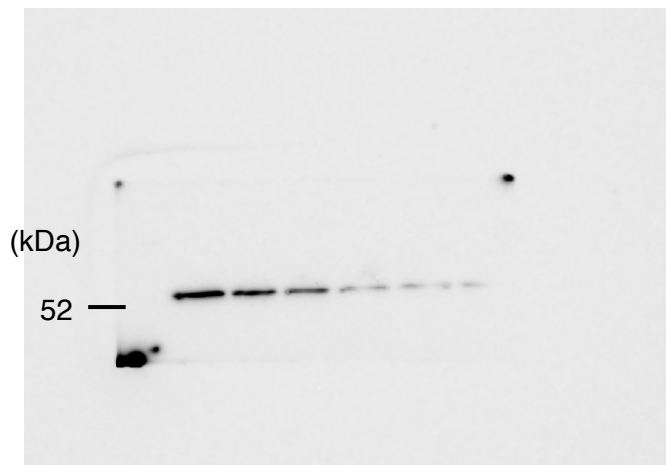

**IB: Calreticulin**

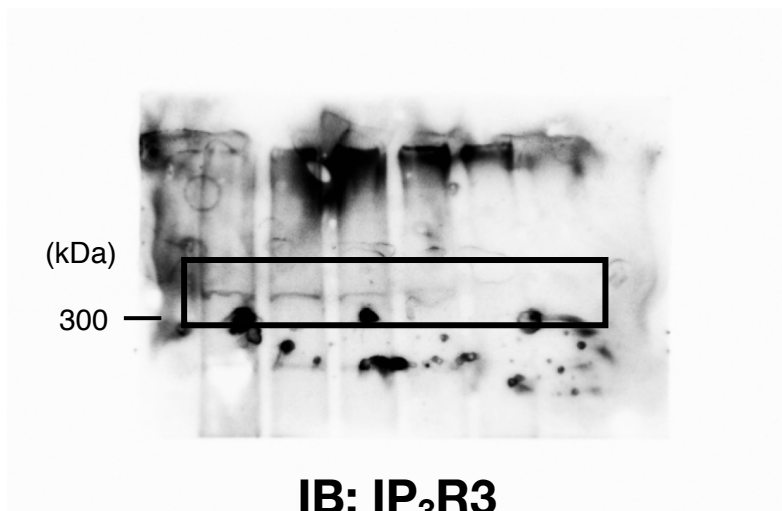

**IB: IP<sub>3</sub>R3**

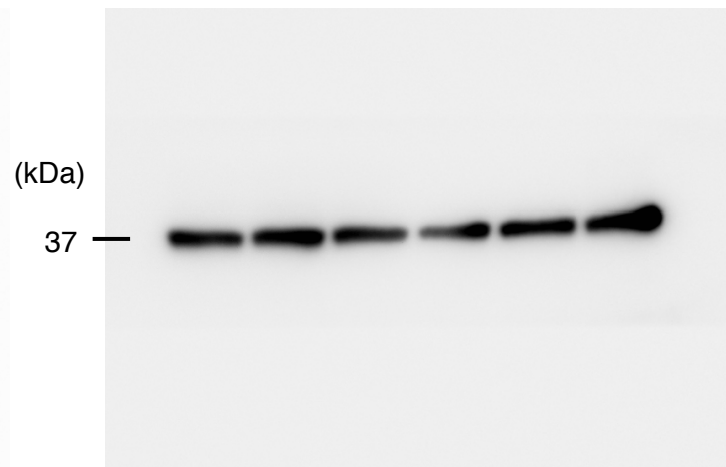

**IB: GAPDH**

**Fig. 5E**

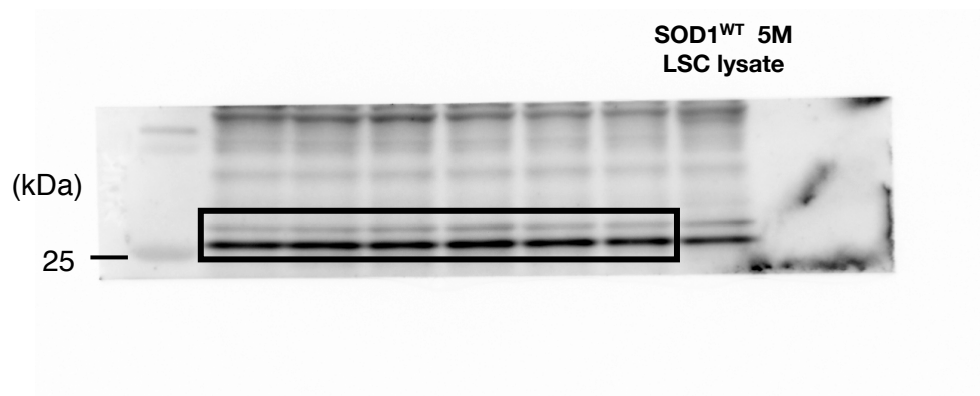

**IB: Sig1R**

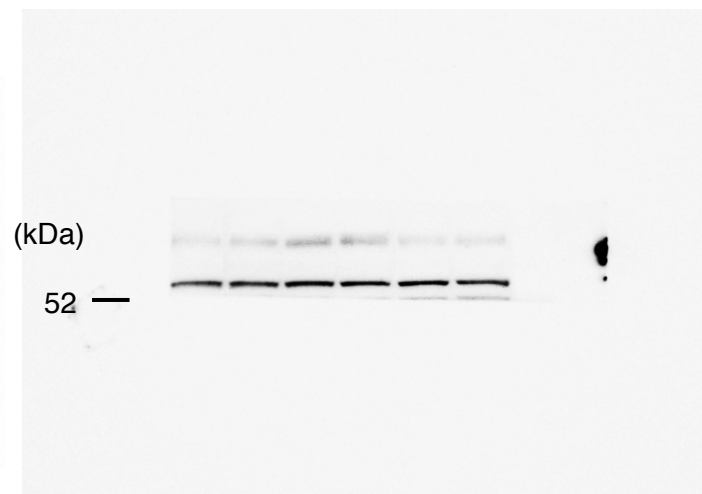

**IB: Calreticulin**

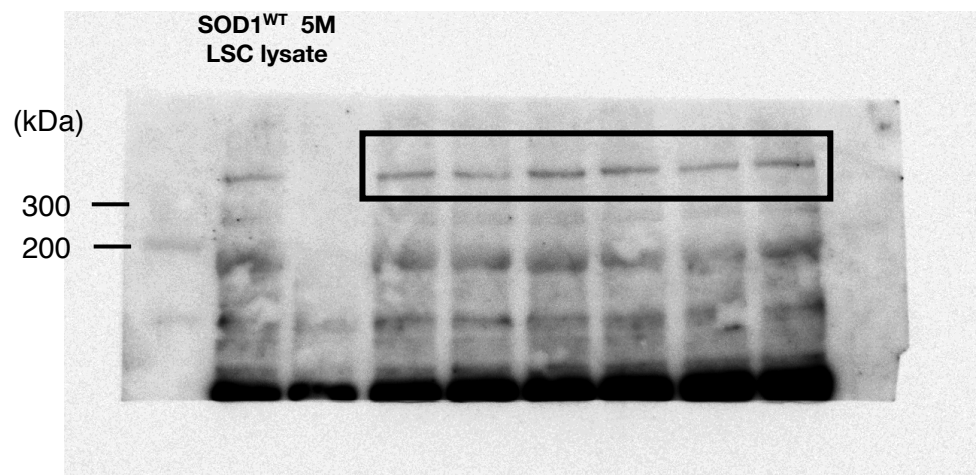

**IB: IP<sub>3</sub>R3**

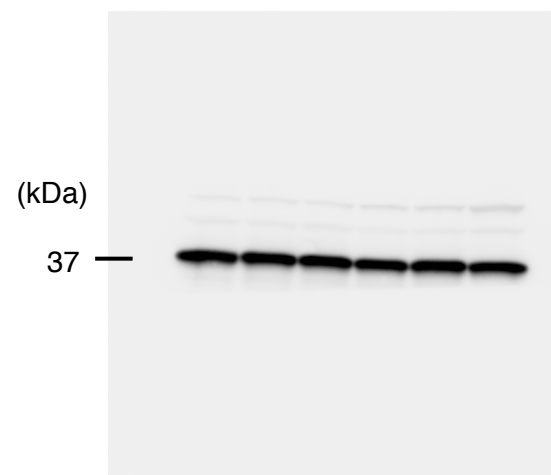

**IB: GAPDH**
