# Supplementary material for: Mitochondria‐associated membrane collapse is a common pathomechanism in SIGMAR1‐ and SOD1‐linked ALS
Source: PubMed Central journal article supplement (PMC5167132; doi:10.15252/emmm.201606403), 2016-11-07

**Fig. 6L**

**IB: IP<sub>3</sub>R3**

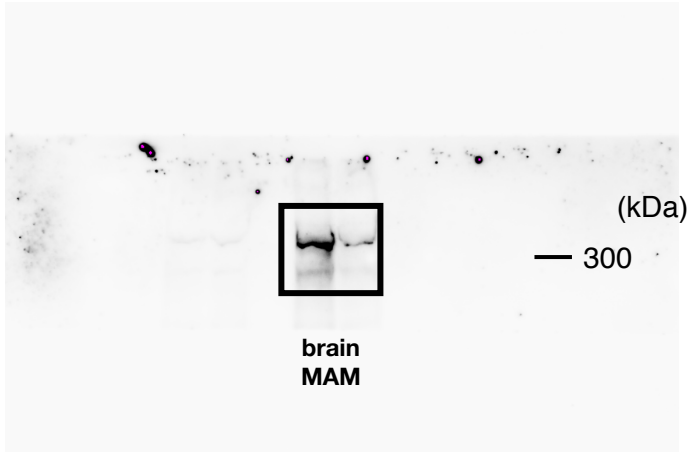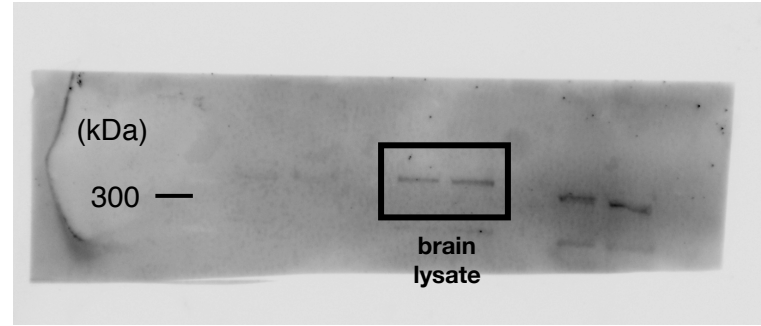

**IB: Calreticulin**

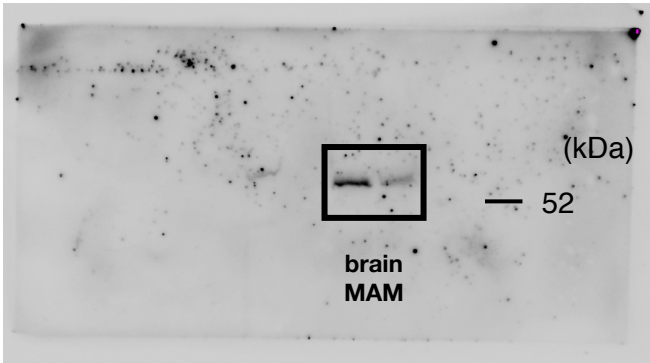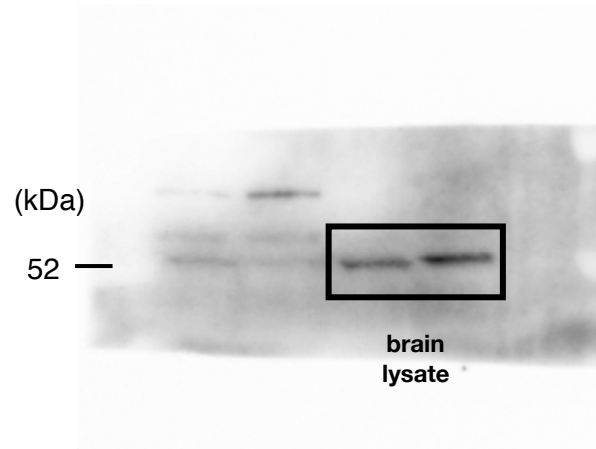

**IB: Sig1R**

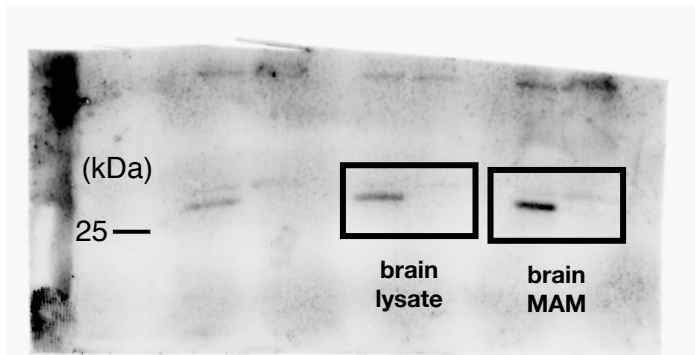

Supplement: EMMM-8-1421-s007.pdf [file EMMM-8-1421-s007.pdf]
