# Supplementary material for: Mitochondria‐associated membrane collapse is a common pathomechanism in SIGMAR1‐ and SOD1‐linked ALS
Source: PubMed Central journal article supplement (PMC5167132; doi:10.15252/emmm.201606403), 2016-11-07
Supplement: EMMM-8-1421-s008.pdf [file EMMM-8-1421-s008.pdf]

**Fig. 7H**

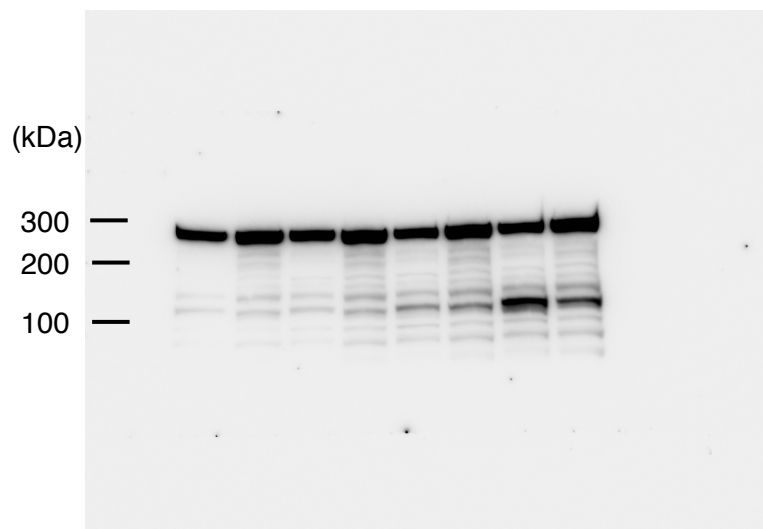

**IB: Spectrin  $\alpha$  II**

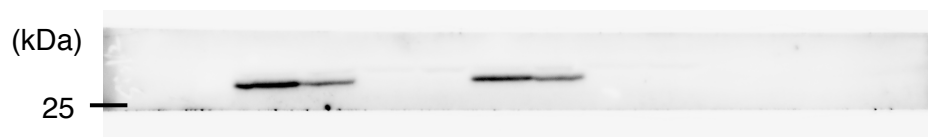

**IB: Sig1R**

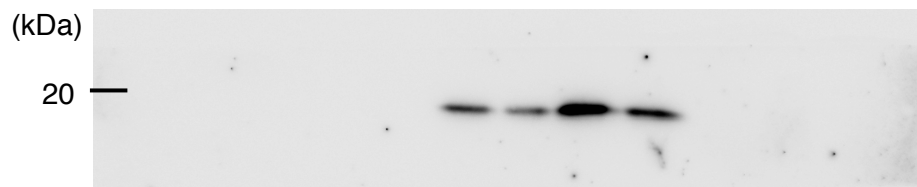

**IB: SOD1**

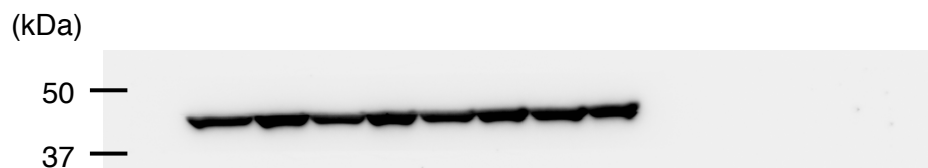

**IB: actin**
